# Supplementary material for: Meningococcal Vaccination Rates Among People With a New Diagnosis of HIV Infection in the US
Source: PubMed Central journal article supplement — JAMA Netw Open. 2022 Apr 29;5(4):e228573. doi: 10.1001/jamanetworkopen.2022.8573 (PMC9055456; doi:10.1001/jamanetworkopen.2022.8573), 2022-04-29

## Supplementary Online Content

Ghaswalla PK, Marshall GS, Bengtson LGS. Meningococcal vaccination rates among people with a new diagnosis of HIV infection in the US. *JAMA Network Open*. 2022;5(4):e228573. doi:10.1001/jamanetworkopen.2022.8573

**eTable.** ACIP Recommendations for MenACWY Vaccination for People with HIV Infection

**eReferences.**

**eFigure 1.** Study Flow Chart

**eFigure 2.** Plain Language Summary

This supplementary material has been provided by the authors to give readers additional information about their work.

**eTable.** ACIP Recommendations for MenACWY Vaccination for People with HIV Infection<sup>1,2</sup>

| Vaccine                    | Recommendations                                                                                                                                                                                                                                                                                                                                                                                                                                                                                                                          |
|----------------------------|------------------------------------------------------------------------------------------------------------------------------------------------------------------------------------------------------------------------------------------------------------------------------------------------------------------------------------------------------------------------------------------------------------------------------------------------------------------------------------------------------------------------------------------|
| <b>Primary vaccination</b> |                                                                                                                                                                                                                                                                                                                                                                                                                                                                                                                                          |
| MenACWY-CRM                | <ul style="list-style-type: none"> <li>• Dose 1 at age 8 weeks: 4-dose series at 2, 4, 6, 12 months</li> <li>• Dose 1 at age 3–6 months: 3- or 4-dose series (dose 2 [and dose 3 if applicable] ≥8 weeks after previous dose until a dose is received at age ≥7 months, followed by an additional dose ≥12 weeks later and after age 12 months)</li> <li>• Dose 1 at age 7–23 months: 2-dose series (dose 2 ≥12 weeks after dose 1 and after age 12 months)</li> <li>• Dose 1 at age ≥24 months: 2-dose series ≥8 weeks apart</li> </ul> |
| MenACWY-D                  | <ul style="list-style-type: none"> <li>• Age 9–23 months: not recommended</li> <li>• Age ≥24 months: 2-dose series ≥8 weeks apart</li> </ul>                                                                                                                                                                                                                                                                                                                                                                                             |
| MenACWY-TT                 | <ul style="list-style-type: none"> <li>• Dose 1 at age ≥24 months: 2-dose series ≥8 weeks apart</li> </ul>                                                                                                                                                                                                                                                                                                                                                                                                                               |
| <b>Boosters</b>            | <p>If the person remains at increased risk:</p> <ul style="list-style-type: none"> <li>• Aged &lt;7 years: single dose 3 years after primary vaccination and every 5 years thereafter</li> <li>• Aged ≥7 years: single dose at 5 years after primary vaccination and every 5 years thereafter</li> </ul>                                                                                                                                                                                                                                 |

ACIP, Advisory Committee on Immunization Practices; HIV, human immunodeficiency virus; MenACWY, meningococcal A, C, W, Y; MenACWY-CRM, MenACWY oligosaccharide diphtheria CRM197 conjugate vaccine; MenACWY-D, MenACWY polysaccharide diphtheria toxoid conjugate vaccine; MenACWY-TT, MenACWY polysaccharide tetanus toxoid conjugate vaccine.

**eReferences.**

1. Centers for Disease Control and Prevention (CDC). Recommended child and adolescent immunization schedule for ages 18 years or younger, United States, 2021. Accessed November 12, 2021. <https://www.cdc.gov/vaccines/schedules/hcp/imz/child-adolescent.html>
2. Mbaeyi SA, Bozio CH, Duffy J, et al. Meningococcal vaccination: Recommendations of the Advisory Committee on Immunization Practices, United States, 2020. *MMWR Recomm Rep*. 2020;69(9):1-41. doi: 10.15585/mmwr.rr6909a1

**eFigure 1. Study Flow Chart**

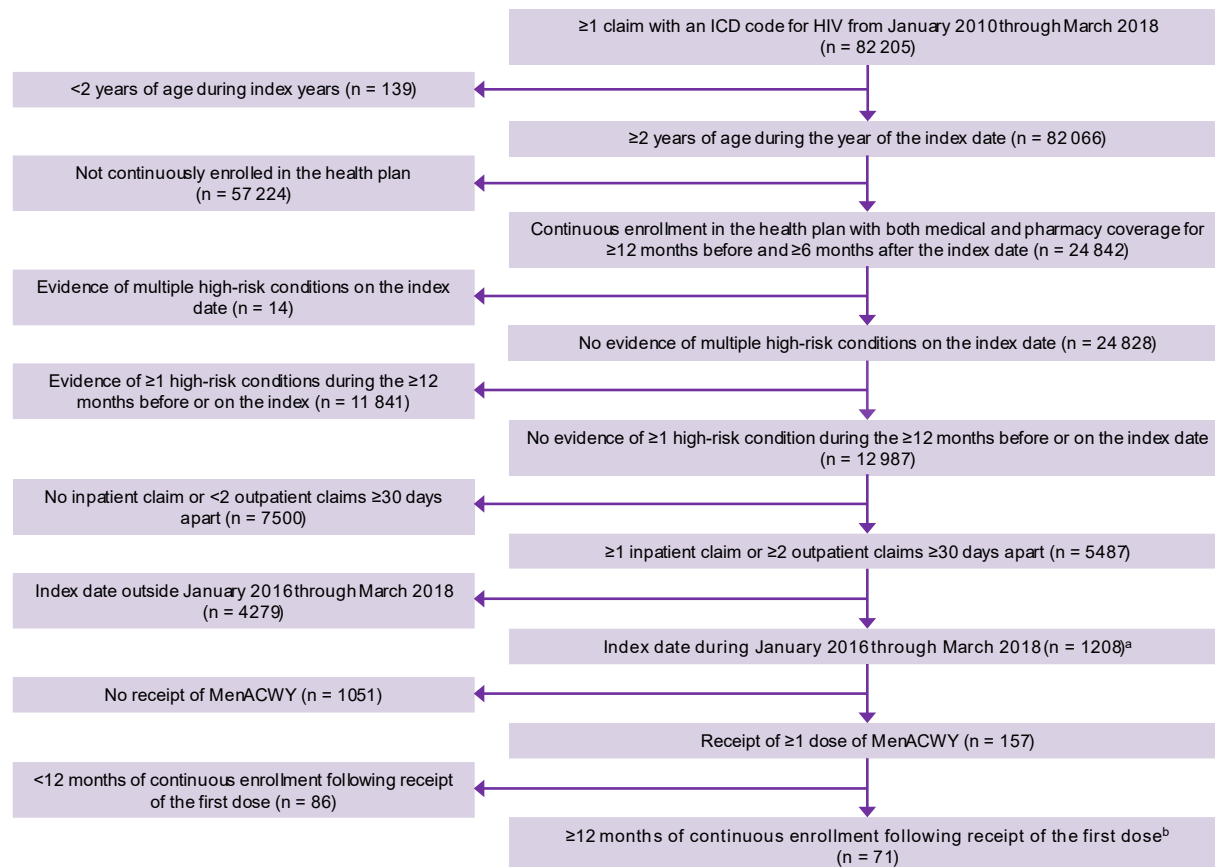

Abbreviations: HIV, human immunodeficiency virus; ICD, International Classification of Diseases; MenACWY, meningococcal serogroups A, C, W, Y vaccine; n, number of people.

<sup>a</sup> Eligible for primary analyses (ie, receipt of ≥1 dose of MenACWY).

<sup>b</sup> Eligible for secondary analyses (ie, receipt of ≥2 doses of MenACWY).

**eFigure 2.** Plain Language Summary

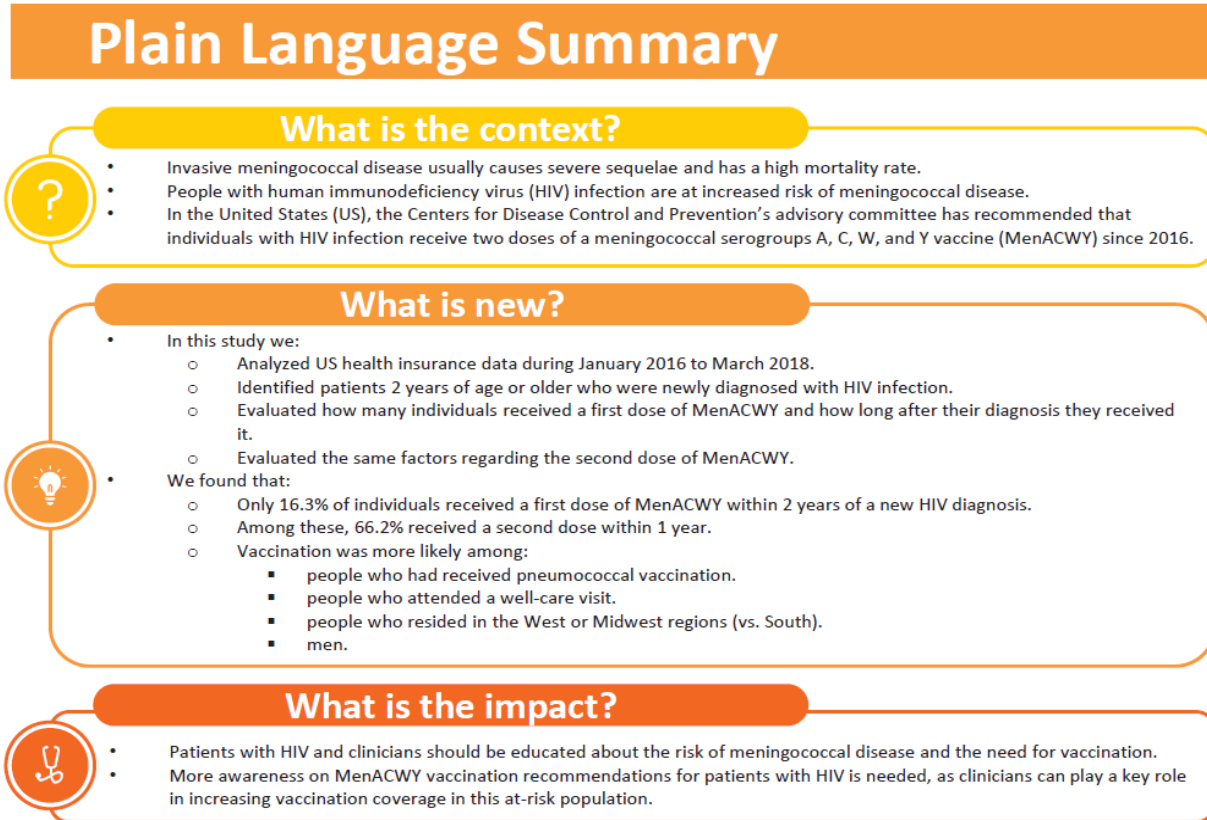

Supplement: jamanetwopen-e228573-s001.pdf [file jamanetwopen-e228573-s001.pdf]
